# Supplementary material for: Timing of the onset of a developmental cell death is controlled by transcriptional induction of the C. elegans ced-3 caspase-encoding gene
Source: Oxford University Press journal article supplement (doi:10.1242/dev.02818), 2007-03-01
Supplement: dev02818tables1.pdf [file dev02818tables1.pdf]

**Table S1. Effect of *C. elegans* and *C. briggsae* *ced-3* promoter::GFP transgenes on tail-spike and pharyngeal cell death**

| Genotype                                                              | % surviving tail-spike cells <sup>a</sup> | Average no. extra cells in anterior pharynx |
|-----------------------------------------------------------------------|-------------------------------------------|---------------------------------------------|
| <i>C. elegans ced-3</i> promoter::GFP ( <i>nsEx723</i> )              | 17±7.0 <sup>b</sup>                       | 0.07±0.26 <sup>c</sup>                      |
| <i>C. elegans ced-3</i> promoter::GFP ( <i>nsEx724</i> ) <sup>d</sup> | 0±0                                       | 0.14±0.44                                   |
| <i>C. briggsae ced-3</i> promoter::GFP ( <i>nsIs23</i> )              | 0±0                                       | 0.05±0.22                                   |
| <i>C. briggsae ced-3</i> promoter::GFP ( <i>nsIs25</i> )              | 0±0                                       | 0.5±0.22                                    |

<sup>a</sup>For each genotype, between 20-30 L2 or L4 stage animals were scored for inappropriate survival of tail-spike or pharyngeal cells, respectively.

<sup>b</sup>Standard error of the mean. <sup>c</sup>Mean±standard deviation. <sup>d</sup>GFP expression from the *nsEx724* transgene was very weak.
